# Supplementary material for: PAX5 P80R-mutated B-cell acute lymphoblastic leukemia with transformation to histiocytic sarcoma: clonal evolution assessment using NGS-based immunoglobulin clonality and mutation analysis
Source: Springer Nature journal article supplement (doi:10.1007/s00428-022-03428-y), 2022-10-14
Supplement: MOESM1 [file 23604430]

## Supplementary information

### Title

PAX5 P80R-mutated B-cell acute lymphoblastic leukemia with transformation to histiocytic sarcoma  
– clonal evolution assessment using NGS-based immunoglobulin clonality and mutation analysis

### Journal:

Virchows Archiv

### Authors:

L. I. Kroeze<sup>1</sup>, B. Scheijen<sup>1,2</sup>, K.M. Hebeda<sup>1</sup>, J. Rijntjes<sup>1</sup>, J.A.C.W. Luijks<sup>1</sup>, D. Evers<sup>3</sup>, W.Hobo<sup>4</sup>, P.J.T.A. Groenen<sup>1</sup>, M. van den Brand<sup>1</sup>

### Affiliations:

<sup>1</sup>Department of Pathology, Radboud university medical center, Nijmegen, The Netherlands

<sup>2</sup>Radboud Institute for Molecular Life Sciences, Nijmegen, The Netherlands

<sup>3</sup>Department of Hematology, Radboud university medical center, Nijmegen, The Netherlands

<sup>4</sup>Department of Laboratory Medicine - Laboratory of Hematology, Radboud university medical center, Nijmegen, The Netherlands.

### Corresponding author:

Leonie I. Kroeze

leonie.kroeze@radboudumc.nl

ORCID-ID: 0000-0002-2666-1742

## Supplementary Tables

**Supplementary Table 1:** Immunoflowcytometric phenotyping of the blasts in the bone marrow discriminated 2 B-cell precursor populations, that showed both expression of CD19, CD22, CD34, cytoplasmic CD179a and TdT, but the expression levels and some additional markers (CD10) differed.

| Population | CD19 | CD34 | CD33   | CD10   | CD20 | HLADR | CD38 | cytCD79a+ | cytCD179a+ | TdT | CD22   |
|------------|------|------|--------|--------|------|-------|------|-----------|------------|-----|--------|
| 1          | +    | +    | +(50%) | +(22%) | -    | +     | +    | +         | +          | +   | +(55%) |
| 2          | ++   | +    | +      | -      | -    | ++    | ++   | +         | +          | +   | +      |

## Supplementary Table 2: SNP-array

|                       |                                                                                                      |                                               |
|-----------------------|------------------------------------------------------------------------------------------------------|-----------------------------------------------|
| Array results         | 1q21.1qter(143932350_249224684)x3[0.35]                                                              | [gain 105,3 Mb]                               |
|                       | 9pterp13.1(192129_38787480)x1                                                                        | [deletie 38,6 Mb; bevat CDKN2A/B en PAX5 gen] |
|                       | 16q11.2qter(46463673_90163275)x1[0.35]                                                               | [deletie 43,7 Mb]                             |
|                       | 20q11.21q13.2(31532616_50232497)x1                                                                   | [deletie 18,7 Mb]                             |
|                       | 20q13.2qter(54937543_62915556)x1                                                                     | [deletie 8 Mb]                                |
| Array-based karyotype | 46,XY,dup(1)(q21.1qter),del(9)(pterp13.1),del(16)(q11.2qter),del(20)(q11.21q13.2),del(20)(q13.2qter) |                                               |

## Supplementary Table 3: Immunohistochemical expression of the histiocytic sarcoma in the skin.

| Positive markers  | Negative markers |
|-------------------|------------------|
| CD68              | CD20             |
| CD163             | CD79a            |
| CD14              | CD10             |
| CD4 (weak)        | CD34             |
| Lysozyme (partly) | TdT              |
|                   | CD117            |
|                   | MPO              |
|                   | CD1a             |
|                   | CD123            |
|                   | CD23             |
|                   | CD56             |
|                   | TCL-1            |
|                   | Tryptase         |

**Supplementary Table 4:** Pathogenic mutations detected using TruSight oncology 500

|                        |                   |                         | <b>B-ALL</b><br>(90% tumor cells) | <b>HS</b><br>(70% tumor cells) |
|------------------------|-------------------|-------------------------|-----------------------------------|--------------------------------|
| <b>Gene</b>            | <b>Transcript</b> | <b>Mutation</b>         | <b>VAF</b>                        | <b>VAF</b>                     |
| PAX5                   | NM_016734.2       | c.239C>G p.(Pro80Arg)   | 88%                               | 56%                            |
| KRAS                   | NM_004985.5       | c.35G>A p.(Gly12Asp)    | 4%                                | 31%                            |
| CDKN2A                 | NM_000077.4       | c.151dup p.(Val51fs)    | 14%                               | -                              |
| PTPN11 <sup>^</sup>    | NM_002834.5       | c.218C>T p.(Thr73Ile)   | 14%                               | -                              |
| PTPN11 <sup>#</sup>    | NM_002834.5       | c.1508G>C p.(Gly503Ala) | 9%                                | -                              |
| PTPN11 <sup>#</sup>    | NM_002834.5       | c.1507G>A p.(Gly503Arg) | 3%                                | -                              |
| PTPN11 <sup>#</sup>    | NM_002834.5       | c.1504T>C p.(Ser502Pro) | 3%                                | -                              |
| PTPN11 <sup>^</sup>    | NM_002834.5       | c.215C>T p.(Ala72Val)   | 2%                                | -                              |
| NRAS                   | NM_002524.5       | c.37G>C p.(Gly13Arg)    | 1%                                | -                              |
| RAF1                   | NM_002880.3       | c.1171A>T p.(Arg391Trp) | - *                               | 37%                            |
| Median unique coverage |                   |                         | 737x                              | 807x                           |

\* Covered by 932 unique reads: not any T detected at this position in the B-ALL sample

# and ^: mutations close together, but present in different sequencing reads

**Supplementary Table 5:** Copy number variations detected using TruSight oncology 500

|               | <b>B-ALL</b><br>(90% tumor cells) | <b>HS</b><br>(70% tumor cells) |
|---------------|-----------------------------------|--------------------------------|
| <b>CDKN2A</b> | mono-allelic loss*                | bi-allelic loss                |
| <b>PAX5</b>   | mono-allelic loss                 | mono-allelic loss              |

\* It can not be excluded that bi-allelic loss is present in a small subclone

## Supplementary Figures

### A: IGHV-IGHJ FR1

**B-ALL**  
Clonal

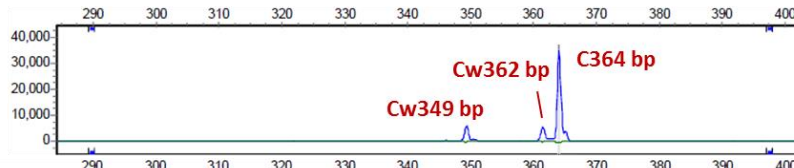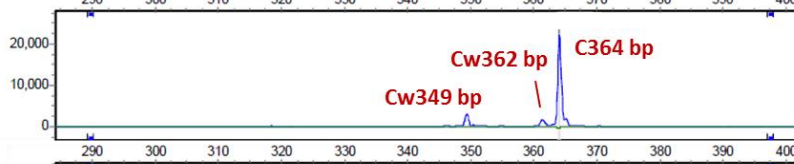

**HS**  
Clonal

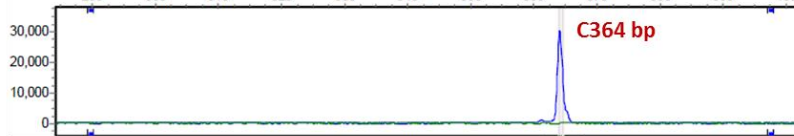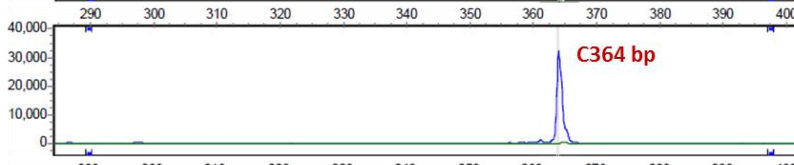

**Polyclonal control**

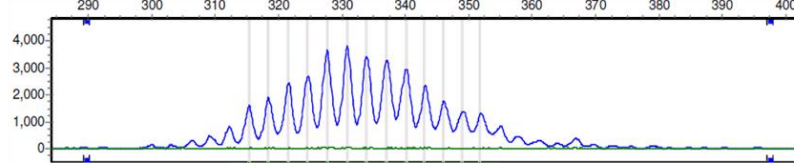

### B: IGHV-IGHJ FR2

**B-ALL**  
Clonal

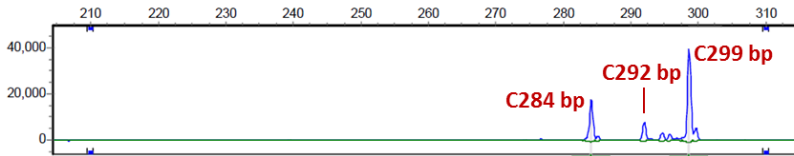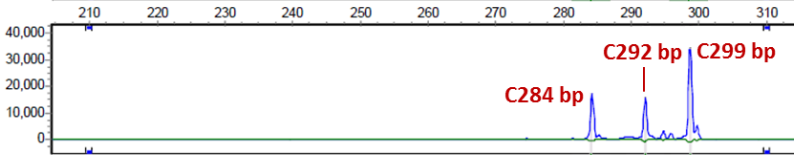

**HS**  
Clonal

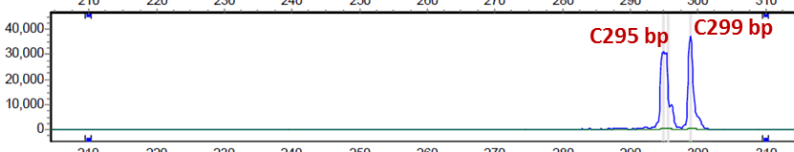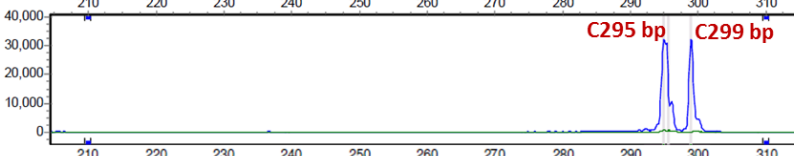

**Polyclonal control**

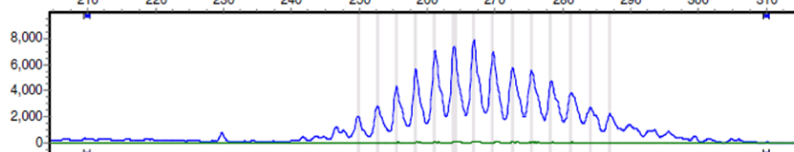

**C: IGHV-IGHJ FR3**

**B-ALL**  
Clonal

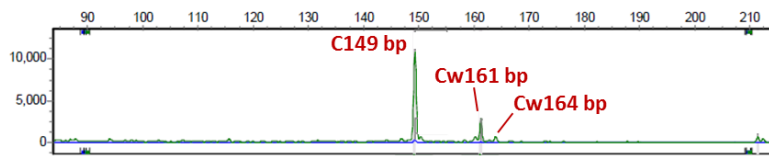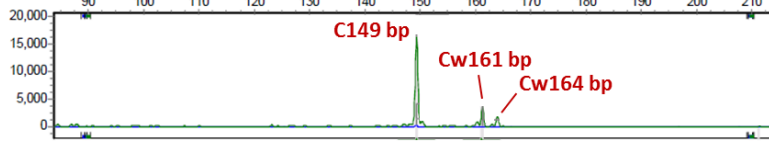

**HS**  
Clonal

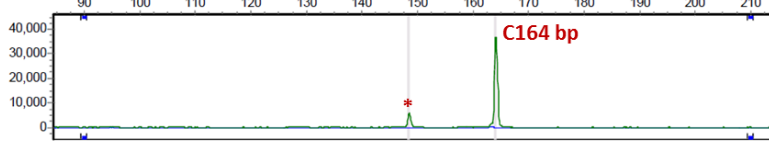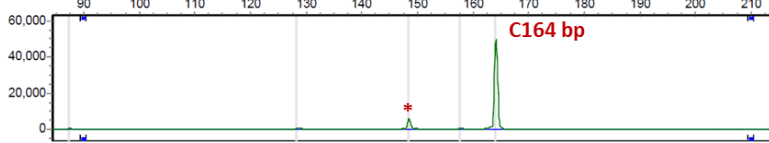

**Polyclonal control**

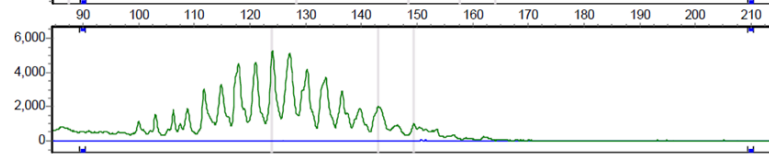

**D: IGHD-IGHJ**

**B-ALL**  
Clonal

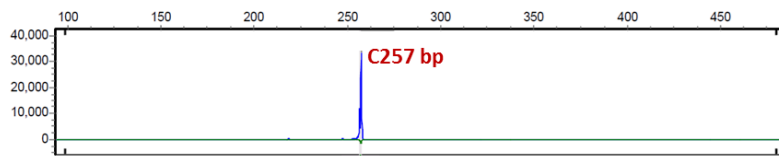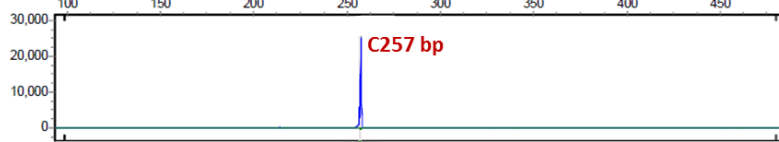

**HS**  
No specific product

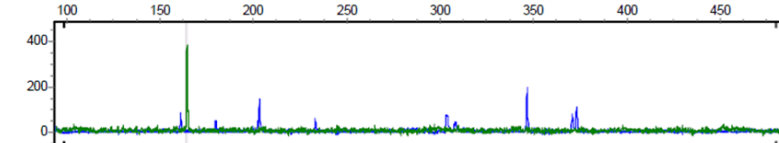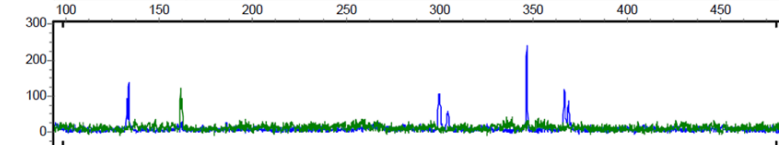

**Polyclonal control**

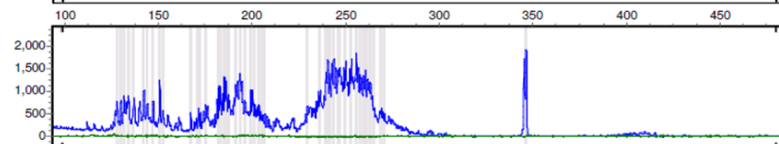

**E: IGKV-IGKJ**

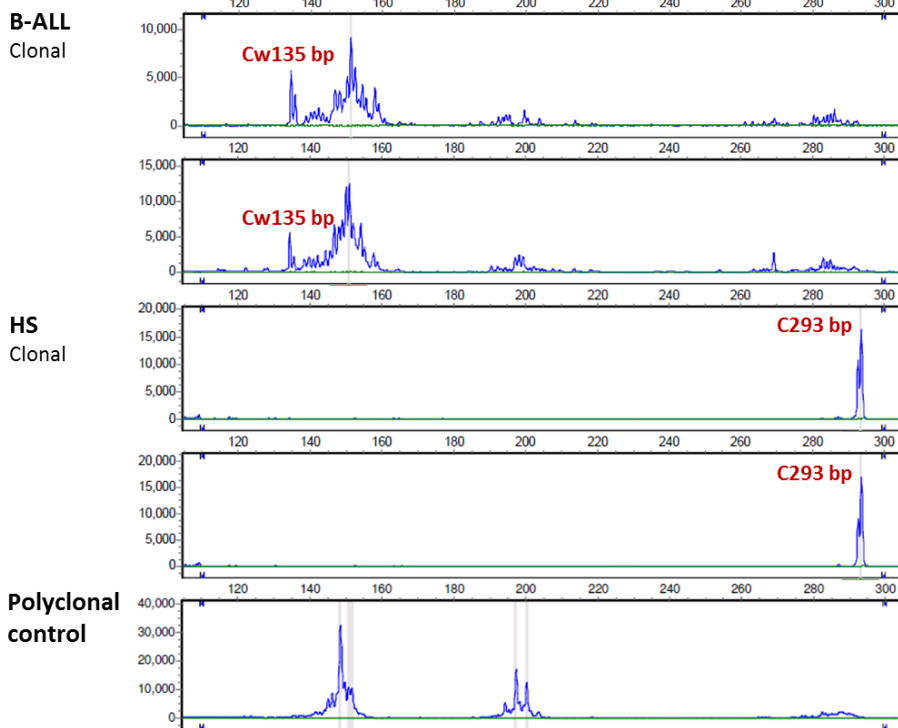

**F: IGKV/intron-IGKde**

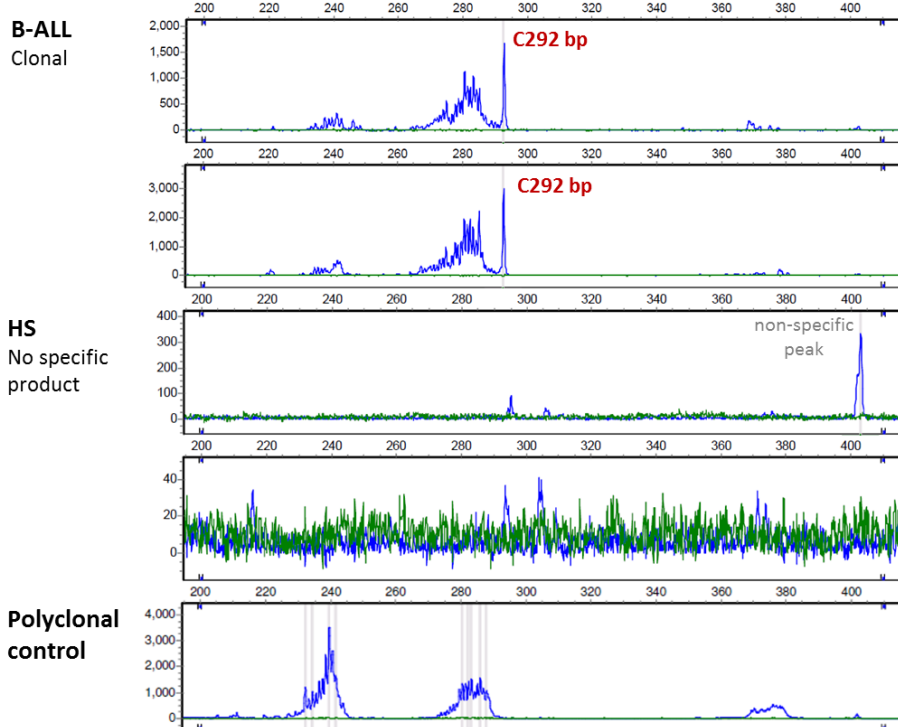

**Supplementary Fig. 1:** GeneScanning results of the EuroClonality/BIOMED-2 IG assays. For each target a duplicate analysis for the ALL and the HS sample is shown and in addition a polyclonal control. A) IGHV-IGHJ FR1; B) IGHV-IGHJ FR2; C) IGHV-IGHJ FR3; D) IGHD-IGHJ; E) IGKV-IGKJ; F) IGKV/intron-IGKde. B-ALL, B-cell acute lymphoblastic leukemia; HS, histiocytic sarcoma; FR, framework; C, clonal; Cw, clonal weak; and bp, base pairs.

\* Sanger sequencing analysis of this product (Cw148 bp) showed that this is a result of cross-annealing of the IGH V4 primer to the V6-1 gene. Therefore, this small peak also represents the V6-1 rearrangement (similar as the C164 bp product resulting from the IGH V6 primer).

**A: IGHV-IGHJ FR3**

**B-ALL: Clonal (122028 reads)**

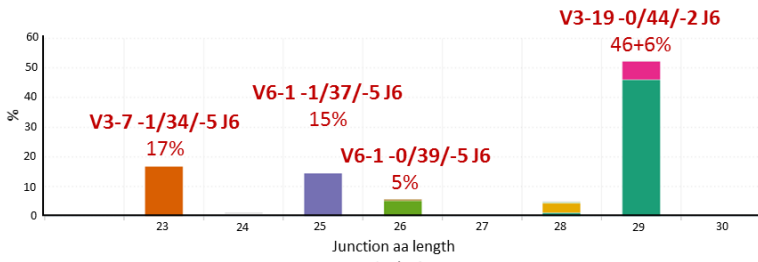

| rearrangement type | clonotype        | junction in amino acids      | junction information | junction aa length | %    |
|--------------------|------------------|------------------------------|----------------------|--------------------|------|
| VJ:Vh-(Dh)-Jh      | V3-19-0/44/-2 J6 | CVRNG*GYDILTYPRR#YYYYYMDVW   | unp                  | 29                 | 46.2 |
| VJ:Vh-(Dh)-Jh      | V3-7-1/34/-5 J6  | CASPFQ*YQLLCFYYYYGMDVW       | unp                  | 23                 | 16.9 |
| VJ:Vh-(Dh)-Jh      | V6-1-1/37/-5 J6  | CARGTCESTSCYVS#YYYYGMDVW     | unp                  | 25                 | 14.5 |
| VJ:Vh-(Dh)-Jh      | V3-19-0/45/02 J6 | CVRNG*GY*RYFDWLSSP#YYYYYMDVW | unp                  | 29                 | 6.2  |
| VJ:Vh-(Dh)-Jh      | V6-1-0/39/-5 J6  | CARDGVCSSTSCYVS#YYYYGMDVW    | unp                  | 26                 | 5.3  |
| VJ:Vh-(Dh)-Jh      | V3-19-0/43/-4 J6 | CVRNG*GYDILTYPRR#YYYYYMDVW   | unp                  | 28                 | 3.3  |
| VJ:Vh-(Dh)-Jh      | V3-19-0/44/-2 J6 | CVRNG*GYDILTYPRR#YYYYYMDVW   | unp                  | 28                 | 1.2  |
| VJ:Vh-(Dh)-Jh      | V3-7-1/43/-5 J6  | CARVPF*L**YQLLCFYYYYGMDVW    | unp                  | 26                 | 0.4  |
| VJ:Vh-(Dh)-Jh      | V3-7-0/39/-5 J6  | CARRG*L**YQLLCFYYYYGMDVW     | unp                  | 25                 | 0.2  |
| VJ:Vh-(Dh)-Jh      | V1-2-0/44/-5 J6  | CAREETKDIVVPAAMFL#YYYYGMDVW  | unp                  | 28                 | 0.2  |

**HS: Clonal (105422 reads)**

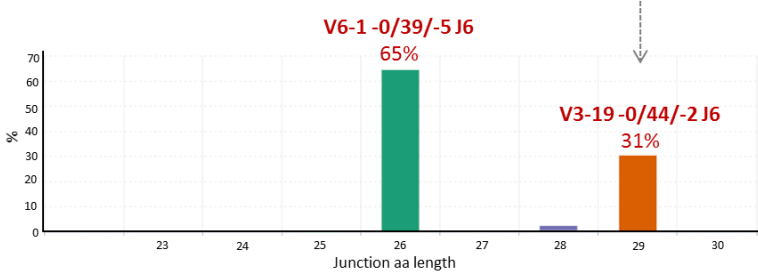

| rearrangement type | clonotype        | junction in amino acids     | junction information | junction aa length | %    |
|--------------------|------------------|-----------------------------|----------------------|--------------------|------|
| VJ:Vh-(Dh)-Jh      | V6-1-0/39/-5 J6  | CARDGVCSSTSCYVS#YYYYGMDVW   | unp                  | 26                 | 64.6 |
| VJ:Vh-(Dh)-Jh      | V3-19-0/44/-2 J6 | CVRNG*GYDILTYPRR#YYYYYMDVW  | unp                  | 29                 | 30.6 |
| VJ:Vh-(Dh)-Jh      | V3-19-0/43/-4 J6 | CVRNG*GYDILTYPRR#YYYYYMDVW  | unp                  | 28                 | 1.8  |
| VJ:Vh-(Dh)-Jh      | V3-19-0/44/-2 J6 | CVRNG*GYDILTYPRR#YYYYYMDVW  | unp                  | 28                 | 0.8  |
| VJ:Vh-(Dh)-Jh      | V6-1-0/32/-1 J6  | CARDGVCSSTSCY#FYYYYGMDVW    | unp                  | 25                 | 0.4  |
| VJ:Vh-(Dh)-Jh      | V6-1-0/39/-5 J6  | CARDGVCSSTSCYVS#YYYYGMDVW   | unp                  | 25                 | 0.1  |
| VJ:Vh-(Dh)-Jh      | V3-19-0/39/-5 J6 | CARDGVCSSTSCYVS#YYYYGMDVW   | unp                  | 26                 | 0.1  |
| VJ:Vh-(Dh)-Jh      | V3-19-0/47/-2 J6 | CVRNG*GYDILTYPRR#YYYYYMDVW  | unp                  | 30                 | 0.08 |
| VJ:Vh-(Dh)-Jh      | V3-19-0/42/-2 J6 | CVRNG*GITIFDWLSSP#YYYYYMDVW | unp                  | 28                 | 0.07 |
| VJ:Vh-(Dh)-Jh      | V6-1-0/39/-5 J6  | CAREWVCSSTSCYVS#YYYYGMDVW   | unp                  | 26                 | 0.07 |

**B: IGHD-IGHJ**

**B-ALL: Clonal (24106 reads)**

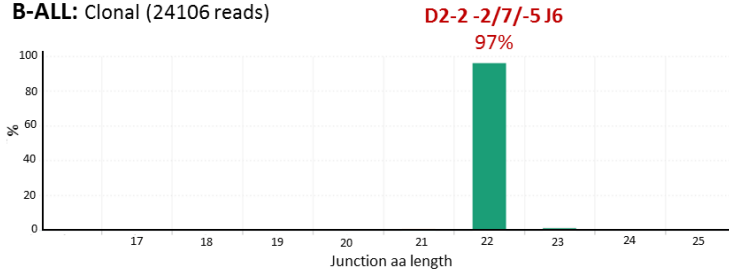

| rearrangement type | clonotype              | junction in amino acids  | junction information | junction aa length | %    |
|--------------------|------------------------|--------------------------|----------------------|--------------------|------|
| DJ:Dh-Jh           | D2-2-2/7/-5 J6         | VRIL**YQLLCFYYYYGMDVW    | pop                  | 22                 | 97.2 |
| DJ:Dh-Jh           | D2-2-2/7/-5 J6         | VRIL**YQLLCFYYYYGMDVW    | pop                  | 23                 | 1.1  |
| DJ:Dh-Jh           | D2-2-2/0/-1 J6         | VRIL**YQLLCFYYYYGMDVW    | pop                  | 21                 | 0.8  |
| DJ:Dh-Jh           | D2-2-2/12/-8 J6        | VRIL**YQLLCFWL#YYYYGMDVW | pop                  | 23                 | 0.07 |
| DJ:Dh-Jh           | D2-2-2/2/-2 J5         | VRIL**YQLLW#NWFDPW       | pop                  | 18                 | 0.06 |
| DJ:Dh-Jh           | D5-5=D5-18 -1/12/-3 J4 | VVDTAMVRGTAHFDYW         | pop                  | 16                 | 0.05 |
| DJ:Dh-Jh           | D2-2-2/7/-5 J6         | VRIL**YQLLCFWHLLRYGTSW   | pop                  | 23                 | 0.05 |
| DJ:Dh-Jh           | D2-2-2/7/-5 J6         | VRIL**YQLLCFYYYYGMDVR    | pop                  | 22                 | 0.03 |
| DJ:Dh-Jh           | D2-2-2/7/-2 J6         | VRIL**YQLLCFYYYYGMDVW    | pop                  | 23                 | 0.03 |
| DJ:Dh-Jh           | D1-26-3/11/-5 J4       | VGIVGATPGV#FDYW          | pop                  | 15                 | 0.03 |

**HS: No specific product (5 reads)**

**C: IGKV-IGKJ**

**B-ALL: Clonal (89337 reads)**

**V1-33=V1D-33 -11/2/-7 J3**

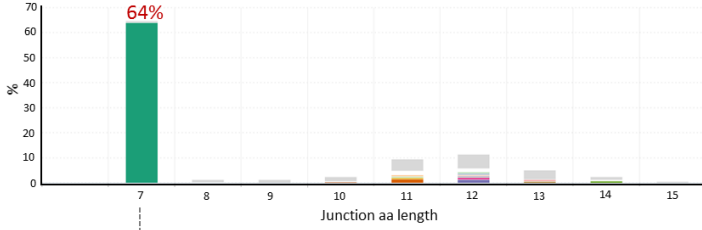

| rearrangement type | clonotype                | junction in amino acids | junction information | junction aa length | %    |
|--------------------|--------------------------|-------------------------|----------------------|--------------------|------|
| VJ:Vk-Jk           | V1-33=V1D-33 -11/2/-7 J3 | CQQYD#F                 | unp                  | 7                  | 64.1 |
| VJ:Vk-Jk           | V2-30=V2D-30 -0/3/-7 J3  | CMQGTWHP#F              | unp                  | 11                 | 1.4  |
| VJ:Vk-Jk           | V1-33=V1D-33 -0/0/-1 J4  | CQQYDNL#LTF             | unp                  | 12                 | 1.3  |
| VJ:Vk-Jk           | V4-1 -0/0/-0 J4          | CQQYSTPPLTF             | pro                  | 12                 | 0.8  |
| VJ:Vk-Jk           | V1-39=V1D-39 -3/9/-0 J4  | CQQSYSTPGSLTF           | pro                  | 14                 | 0.7  |
| VJ:Vk-Jk           | V1-37=V1D-37 -0/0/-5 J4  | GQRTYNAP##F             | unp                  | 11                 | 0.6  |
| VJ:Vk-Jk           | V1-33=V1D-33 -1/10/-6 J4 | CQQYDNLPLKAHF           | pro                  | 13                 | 0.5  |
| VJ:Vk-Jk           | V4-1 -5/2/-0 J2          | CQQYST##CSF             | unp                  | 12                 | 0.4  |
| VJ:Vk-Jk           | V4-1 -1/0/-4 J4          | CQQYSTP#TF              | unp                  | 11                 | 0.4  |
| VJ:Vk-Jk           | V1-37=V1D-37 -2/1/-0 J4  | GQRTYNAP#LTF            | unp                  | 12                 | 0.4  |

**HS: Clonal (124755 reads)**

**V2D-26 -1/2/-0 J4**

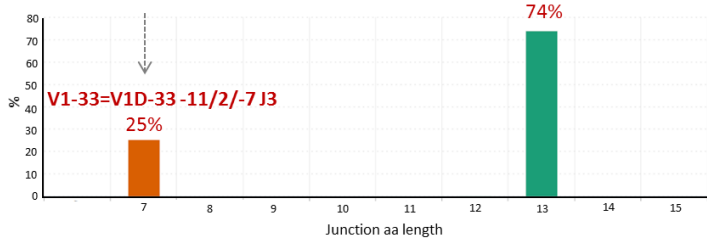

| rearrangement type | clonotype                | junction in amino acids | junction information | junction aa length | %    |
|--------------------|--------------------------|-------------------------|----------------------|--------------------|------|
| VJ:Vk-Jk           | V2D-26 -1/2/-0 J4        | CMQDAQDPQ#LTF           | unp                  | 13                 | 74.1 |
| VJ:Vk-Jk           | V1-33=V1D-33 -11/2/-7 J3 | CQQYD#F                 | unp                  | 7                  | 25.3 |
| VJ:Vk-Jk           | V2D-26 -1/2/-0 J4        | CMQDAQDPQ#LTF           | unp                  | 12                 | 0.2  |
| VJ:Vk-Jk           | V2D-26 -1/2/-0 J4        | CMARCTRSSGSLF           | pro                  | 13                 | 0.03 |
| VJ:Vk-Jk           | V2D-26 -1/2/-0 J4        | CMARCTRSS#LTF           | unp                  | 13                 | 0.02 |
| VJ:Vk-Jk           | V1-33=V1D-33 -11/2/-7 J3 | CQQYD#F                 | unp                  | 6                  | 0.02 |
| VJ:Vk-Jk           | V2D-26 -1/2/-0 J4        | RMARCTRSS#LTF           | unp                  | 13                 | 0.02 |

**D: IGKV/intron-IGKde**

**B-ALL: Clonal (11232 reads)**

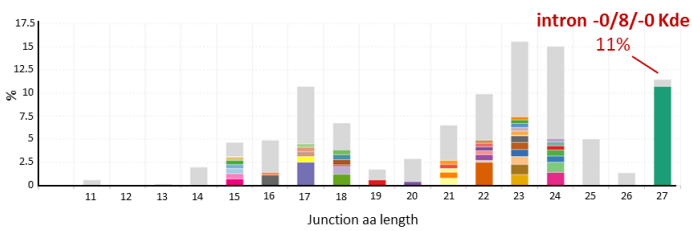

| rearrangement type | clonotype                | junction in amino acids     | junction information | junction aa length | %    |
|--------------------|--------------------------|-----------------------------|----------------------|--------------------|------|
| intron-Kde         | intron -0/8/-0 Kde       | PCVCPIDAAVASFPDASN#SPSGSPGR | unk                  | 27                 | 10.7 |
| Vk-Kde             | V1-37=V1D-37 -4/3/-0 Kde | GQRTYNALRSPSGSPGR           | unk                  | 17                 | 2.5  |
| intron-Kde         | intron -8/2/-2 Kde       | PCVCPINAAVASF#SPSGSPGR      | unk                  | 22                 | 2.5  |
| intron-Kde         | intron -3/3/-0 Kde       | PCVCPINAAVASFPGRSPSGSPGR    | unk                  | 24                 | 1.4  |
| intron-Kde         | intron -3/4/-20 Kde      | PCVCPIDAAVASFP#GR           | unk                  | 18                 | 1.2  |
| intron-Kde         | intron -2/0/-3 Kde       | PCVCPINAAVASF##PSGSPGR      | unk                  | 23                 | 1.2  |
| Vk-Kde             | V4-1 -10/4/-0 Kde        | CQQYTT##SPSGSPGR            | unk                  | 16                 | 1.1  |
| intron-Kde         | intron -2/0/-3 Kde       | PCVCPIDAAVASFP##PSGSPGR     | unk                  | 23                 | 1.1  |
| intron-Kde         | intron -0/0/-2 Kde       | PCVCPIDAAVASFPD#SPSGSPGR    | unk                  | 24                 | 1.1  |
| Vk-Kde             | V5-2 -2/10/-6 Kde        | CLQHDNFPSSSSGSPGR           | unk                  | 18                 | 0.9  |

**HS: No specific product (2 reads)**

**Supplementary Fig. 2: NGS-based clonality results.** For each target the result from the B-ALL and HS sample are shown. On the left the top 50 most abundant clonotypes are visualised in colour, based on the amino acid (AA) junction length (X-axis) and frequency (Y-axis). On the right the top 10 most frequent clonotypes are shown in a table format. A) IGHV-IGHJ FR3; B) IGHJ-IGHJ; C) IGKV-IGKJ; D) IGKV/intron-IGKde. B-ALL, B-cell acute lymphoblastic leukemia; HS, histiocytic sarcoma; FR, framework; unp, unproductive; pro, productive; pop, potentially productive; and unk, unknown.
